# Supplementary material for: Role of Fe decoration on the oxygen evolving state of Co3O4 nanocatalysts
Source: Royal Society of Chemistry journal article supplement (doi:10.1039/d3ee02809g), 2024-01-01
Supplement: d3ee02809g1.pdf [file d3ee02809g1.pdf]

## Supplementary Information

### Role of Fe Decoration on the Oxygen Evolving State of $\text{Co}_3\text{O}_4$ Nanocatalysts

Felix T. Haase<sup>1</sup>, Eduardo Ortega<sup>1</sup>, Sascha Saddeler<sup>2</sup>, Franz-Philipp Schmidt<sup>3</sup>, Daniel Cruz<sup>3</sup>, Fabian Scholten<sup>2</sup>, Martina Rüscher<sup>1</sup>, Andrea Martini<sup>1</sup>, Hyo Sang Jeon<sup>1</sup>, Antonia Herzog<sup>1</sup>, Uta Hejral<sup>1</sup>, Earl M. Davis<sup>1</sup>, Janis Timoshenko<sup>1</sup>, Axel Knop-Gericke<sup>3</sup>, Thomas Lunkenbein<sup>3</sup>, Stephan Schulz<sup>2</sup>, Arno Bergmann<sup>1,\*</sup>, and Beatriz Roldan Cuenya<sup>1\*</sup>

<sup>1</sup>Department of Interface Science, Fritz Haber Institute of the Max Planck Society, Berlin, Germany

<sup>2</sup>Institute for Inorganic Chemistry and Center for Nanointegration Duisburg-Essen [CENIDE], University of Duisburg-Essen, Essen, Germany

<sup>3</sup>Department of Inorganic Chemistry, Fritz Haber Institute of the Max Planck Society, Berlin, Germany

e-mail: [abergmann@fhi-berlin.mpg.de](mailto:abergmann@fhi-berlin.mpg.de), [roldan@fhi-berlin.mpg.de](mailto:roldan@fhi-berlin.mpg.de);

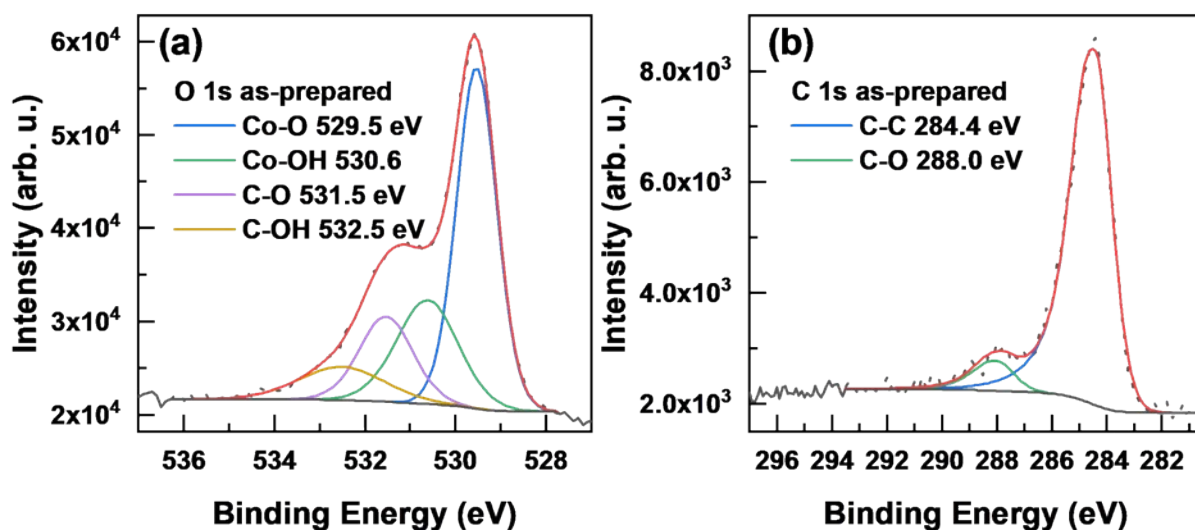

**Supplementary Figure 1.** X-ray photoelectron spectroscopy of (a) O 1s and (b) C 1s regions of  $\text{Co}_3\text{O}_4$  nanocatalysts on glassy carbon substrate. The O 1s and C 1s show the absence of organic residues from the synthesis.

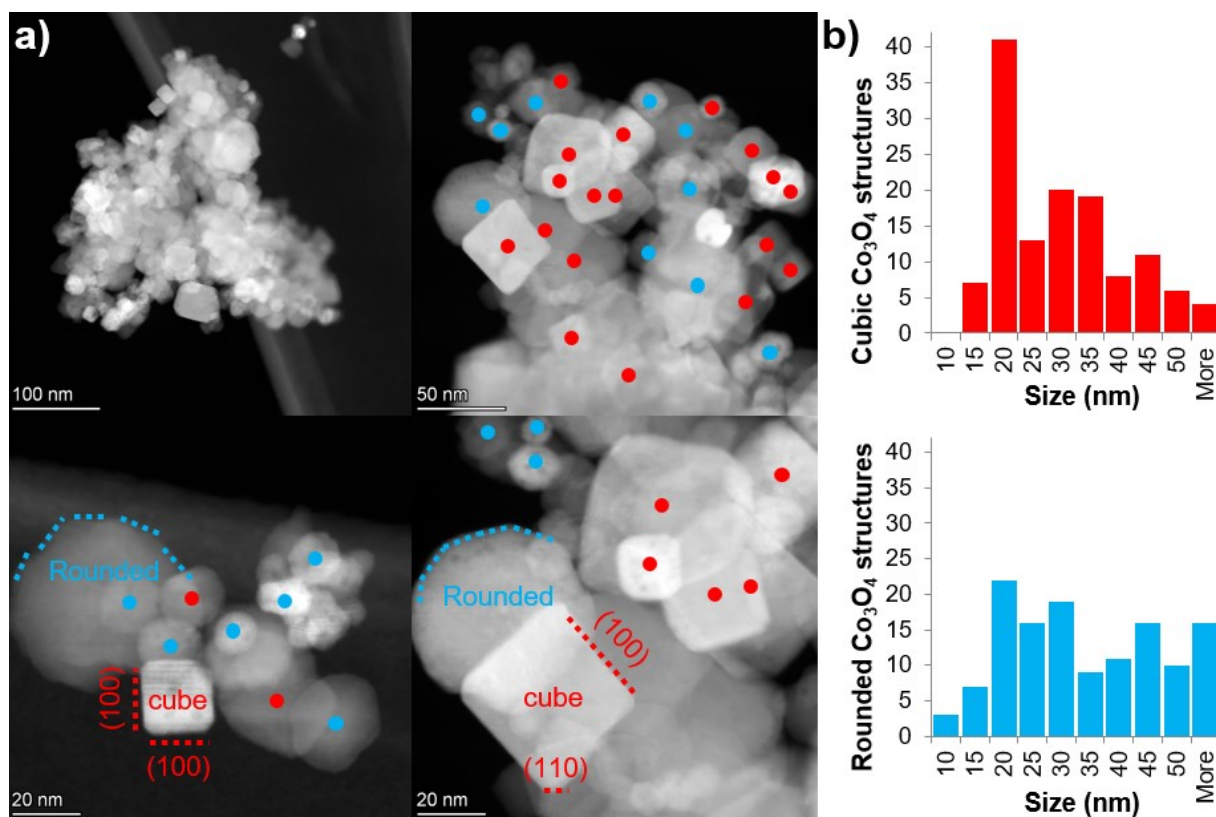

**Supplementary Figure 2.** STEM images of as prepared  $\text{Co}_3\text{O}_4$  catalyst at different magnifications (a) to showcase the difference between the highly cubic and the round-shaped particles and (b) their corresponding size-distributions.

**Supplementary Table 1:** Results from Rietveld refinement of powder XRD data with an added CeO<sub>2</sub> reference (NIST SRM674b). The Rietveld refinement showed two differently sized CeO<sub>2</sub> phases, as well as one Co<sub>3</sub>O<sub>4</sub> spinel phase.

|                       | CeO <sub>2</sub> phase 1 | CeO <sub>2</sub> phase 2 | Co <sub>3</sub> O <sub>4</sub> phase |
|-----------------------|--------------------------|--------------------------|--------------------------------------|
| Space group           | Fm-3m                    | Fm-3m                    | Fd-3mZ                               |
| Fraction (wt%)        | 19.9                     | 33.9                     | 46.2                                 |
| Crystallite size (nm) | 0.95±0.06                | 314±2                    | 32.8±1.0                             |
| Lattice parameter (Å) | 5.413±0.009              | 5.4116510                | 8.08733 ± 0.00011                    |

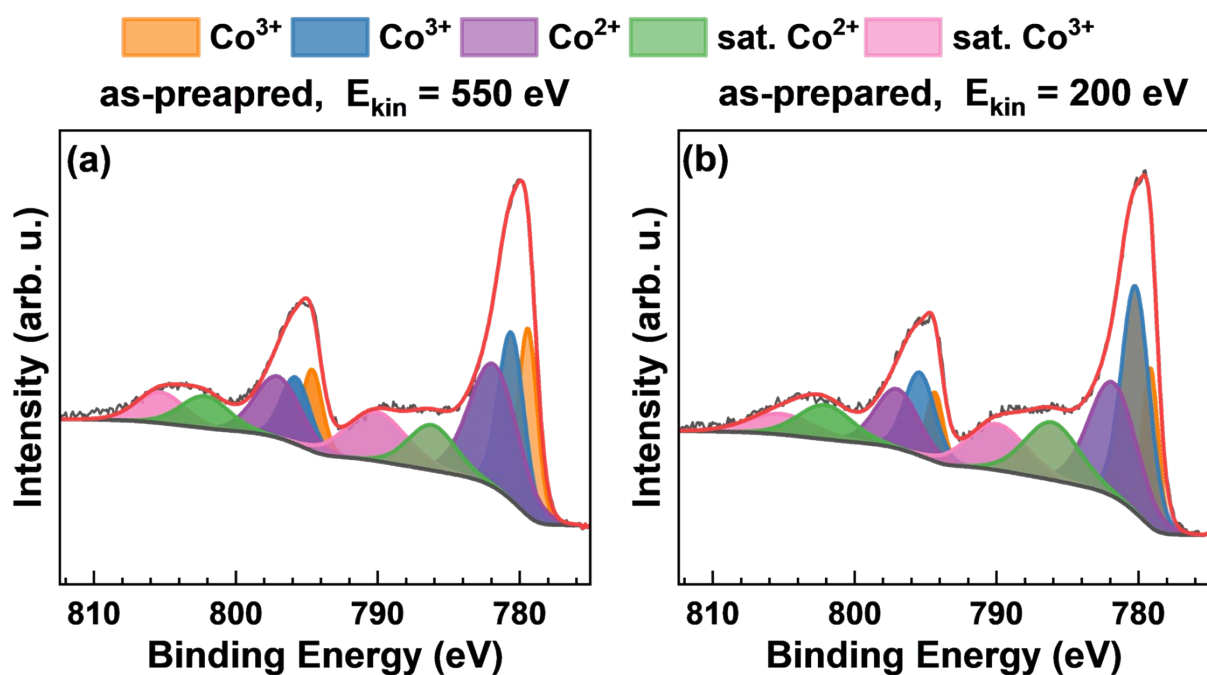

**Supplementary Figure 3.** Co 2p XPS spectra recorded with different excitation energies to collect photoelectrons with kinetic energies of ~550 and ~200 eV for depth-profiling. Spectra of Co<sub>3</sub>O<sub>4</sub> samples in their as-prepared state with (a) ~550 eV and (b) ~200 eV photoelectron energy.<sup>1, 2</sup> The calculated mean free path for ~550 eV kinetic energy is 10.4 Å and 5.6 Å for ~200 eV. Multiplet fitting of Co 2p according to literature.<sup>1, 2</sup>

### **Supplementary Note 1: XPS fitting Co 2p**

All fits for Co 2p are based upon multiplet splitting of Co<sub>3</sub>O<sub>4</sub> spinels according to literature.<sup>1,2</sup> A clear differentiation between Co<sup>2+</sup> and Co<sup>3+</sup> in the main peak at 779-782 eV has proven to be challenging due to the strong overlap. However, the satellite features at 786 and 790 eV for Co<sup>2+</sup> and Co<sup>3+</sup>, respectively, are clearly assigned based on Co<sup>2+</sup> references in the literature compared to the Co<sub>3</sub>O<sub>4</sub> spinel.<sup>1-4</sup> Thus, the satellite at 786 eV can clearly show Co<sup>2+</sup> surface enrichment.

**Supplementary Table 2:** Co 2p XPS parameters of different fitted species as-prepared (Supplementary Figure 3). Provided are binding energies, full-width half maximum (FWHM) and percentage of total peak are for each species.

| Species                           | <b><u>Co 2p E<sub>kin</sub> = 550 eV</u></b> |                  |                 | <b><u>Co 2p E<sub>kin</sub> = 200 eV</u></b> |                  |                 |
|-----------------------------------|----------------------------------------------|------------------|-----------------|----------------------------------------------|------------------|-----------------|
|                                   | <b>Position (eV)</b>                         | <b>FWHM (eV)</b> | <b>Area (%)</b> | <b>Position (eV)</b>                         | <b>FWHM (eV)</b> | <b>Area (%)</b> |
| <b><u>Co 2p<sub>3/2</sub></u></b> |                                              |                  |                 |                                              |                  |                 |
| <b>Co<sup>3+</sup></b>            | 779.4                                        | 1.6              | 12.4            | 779.2                                        | 1.3              | 8.3             |
| <b>Co<sup>3+</sup></b>            | 780.6                                        | 2.1              | 15.1            | 780.2                                        | 2.3              | 21.3            |
| <b>Co<sup>2+</sup></b>            | 781.9                                        | 4.0              | 21.0            | 781.8                                        | 4.0              | 18.5            |
| <b>sat. Co<sup>2+</sup></b>       | 786.2                                        | 3.9              | 7.6             | 786.1                                        | 4.5              | 10.6            |
| <b>sat. Co<sup>3+</sup></b>       | 790.1                                        | 5.0              | 10.5            | 790.0                                        | 4.9              | 9.2             |
| <b><u>Co 2p<sub>1/2</sub></u></b> |                                              |                  |                 |                                              |                  |                 |
| <b>Co<sup>3+</sup></b>            | 794.6                                        | 1.7              | 5.8             | 794.4                                        | 1.4              | 3.9             |
| <b>Co<sup>3+</sup></b>            | 795.8                                        | 2.4              | 6.8             | 795.4                                        | 2.5              | 8.5             |
| <b>Co<sup>2+</sup></b>            | 797.1                                        | 3.8              | 9.9             | 797.0                                        | 3.6              | 8.7             |
| <b>sat. Co<sup>2+</sup></b>       | 802.2                                        | 4.0              | 5.5             | 802.1                                        | 4.5              | 6.3             |
| <b>sat. Co<sup>3+</sup></b>       | 805.3                                        | 4.0              | 5.3             | 805.2                                        | 5.5              | 4.6             |

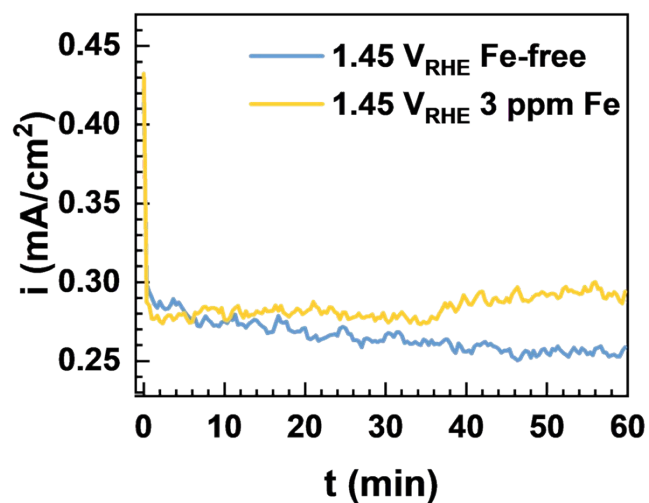

**Supplementary Figure 4.** Anodic conditioning at 1.45 V<sub>RHE</sub> in Fe-free and 3 ppm Fe-containing 0.1 M KOH.

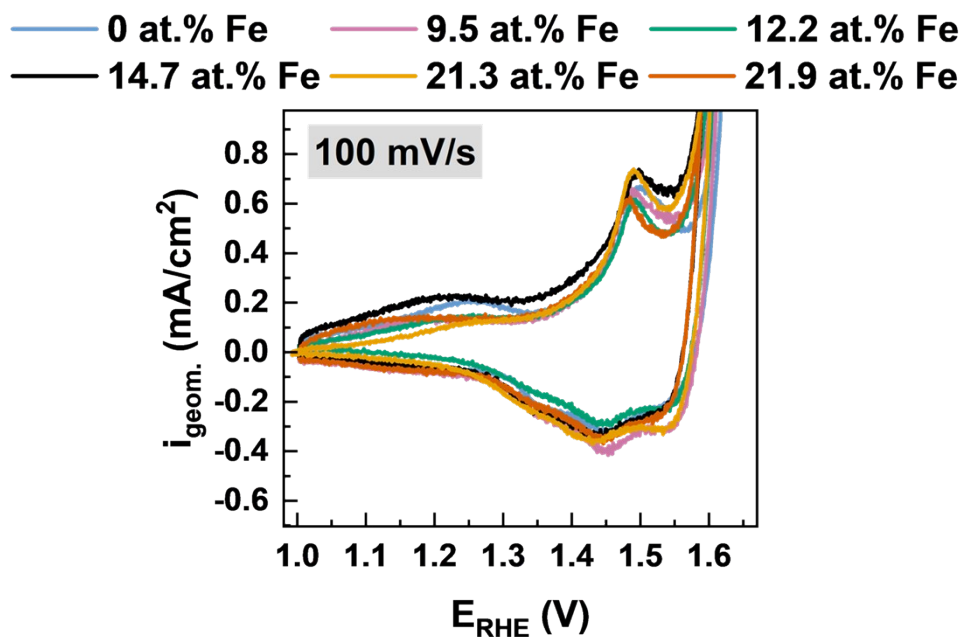

**Supplementary Figure 5.** Cyclic voltammograms with 100 mV/s scan rate in Fe-free 0.1 M KOH after conditioning.

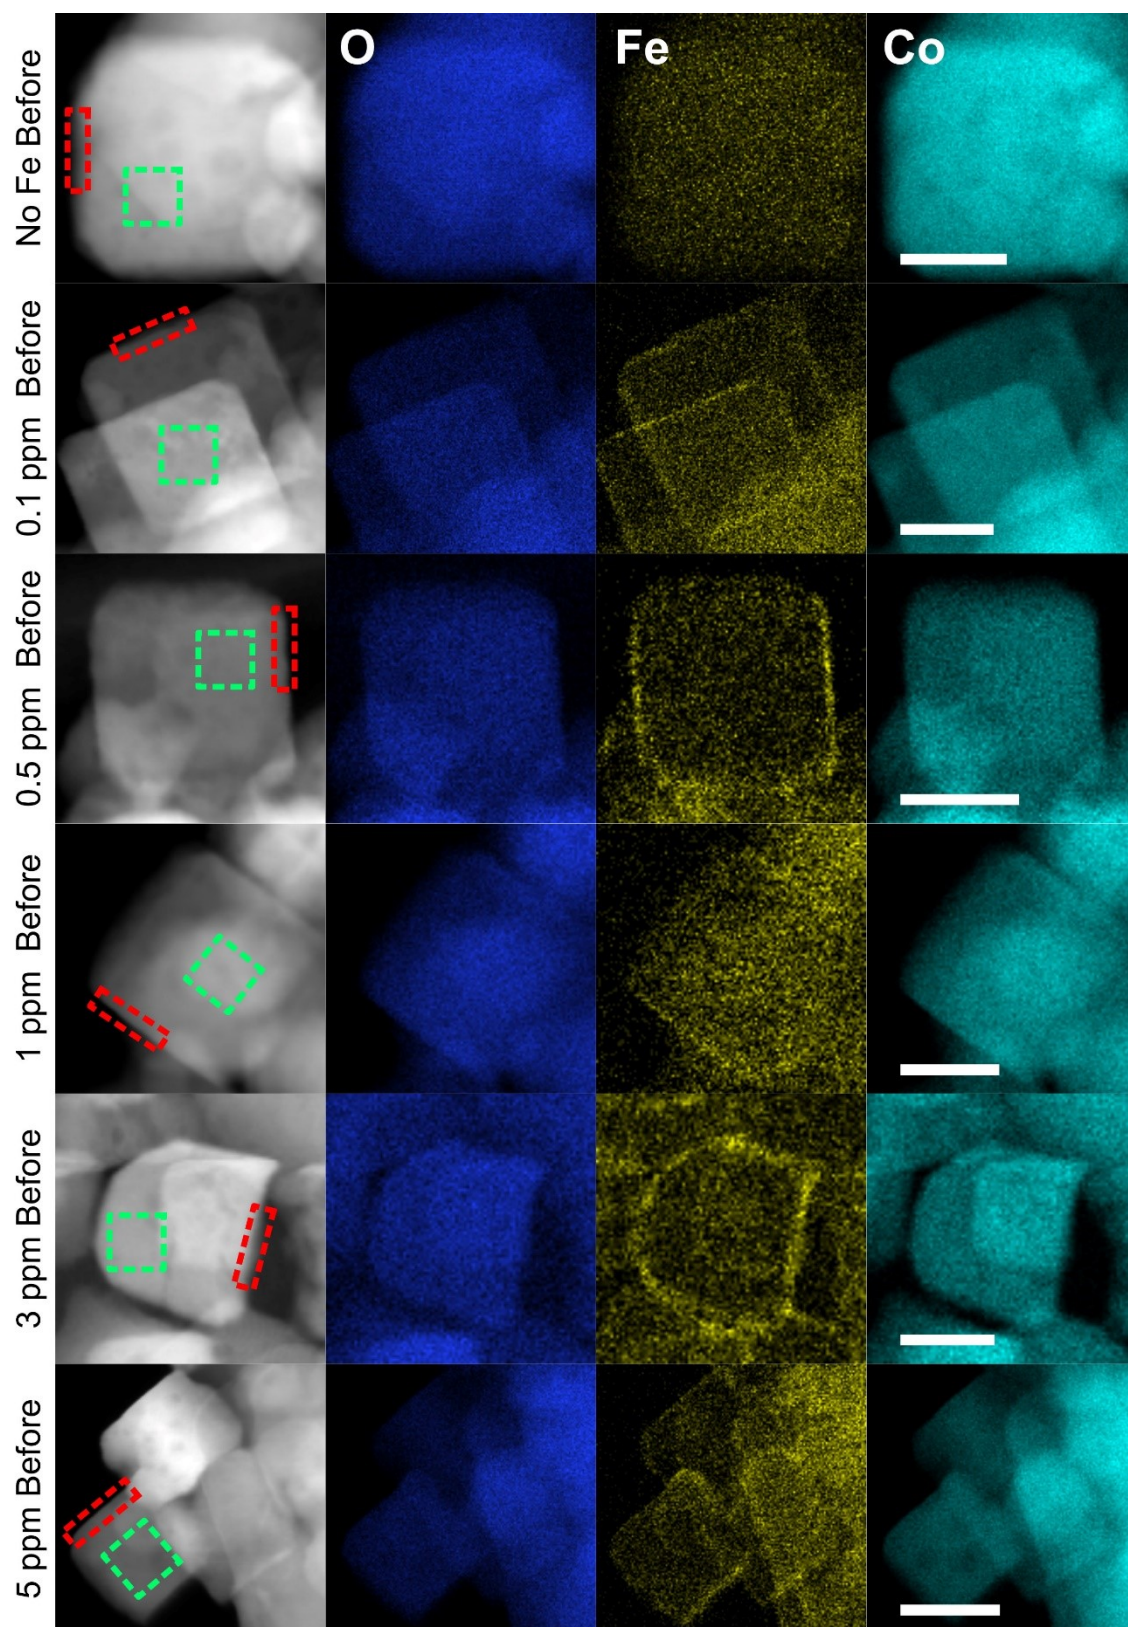

**Supplementary Figure 6.** STEM-HAADF and corresponding EDX O, Fe and Co- $K_{\alpha}$  color maps of cubic (low index facets)  $\text{Co}_3\text{O}_4$  catalysts after conditioning for 1 h at  $1.45 V_{\text{RHE}}$  in 0.1 M KOH with different Fe contents. The highlighted regions were used to calculate the atomic percentage values shown in Supplementary Table 2. Scale bar is 20 nm.

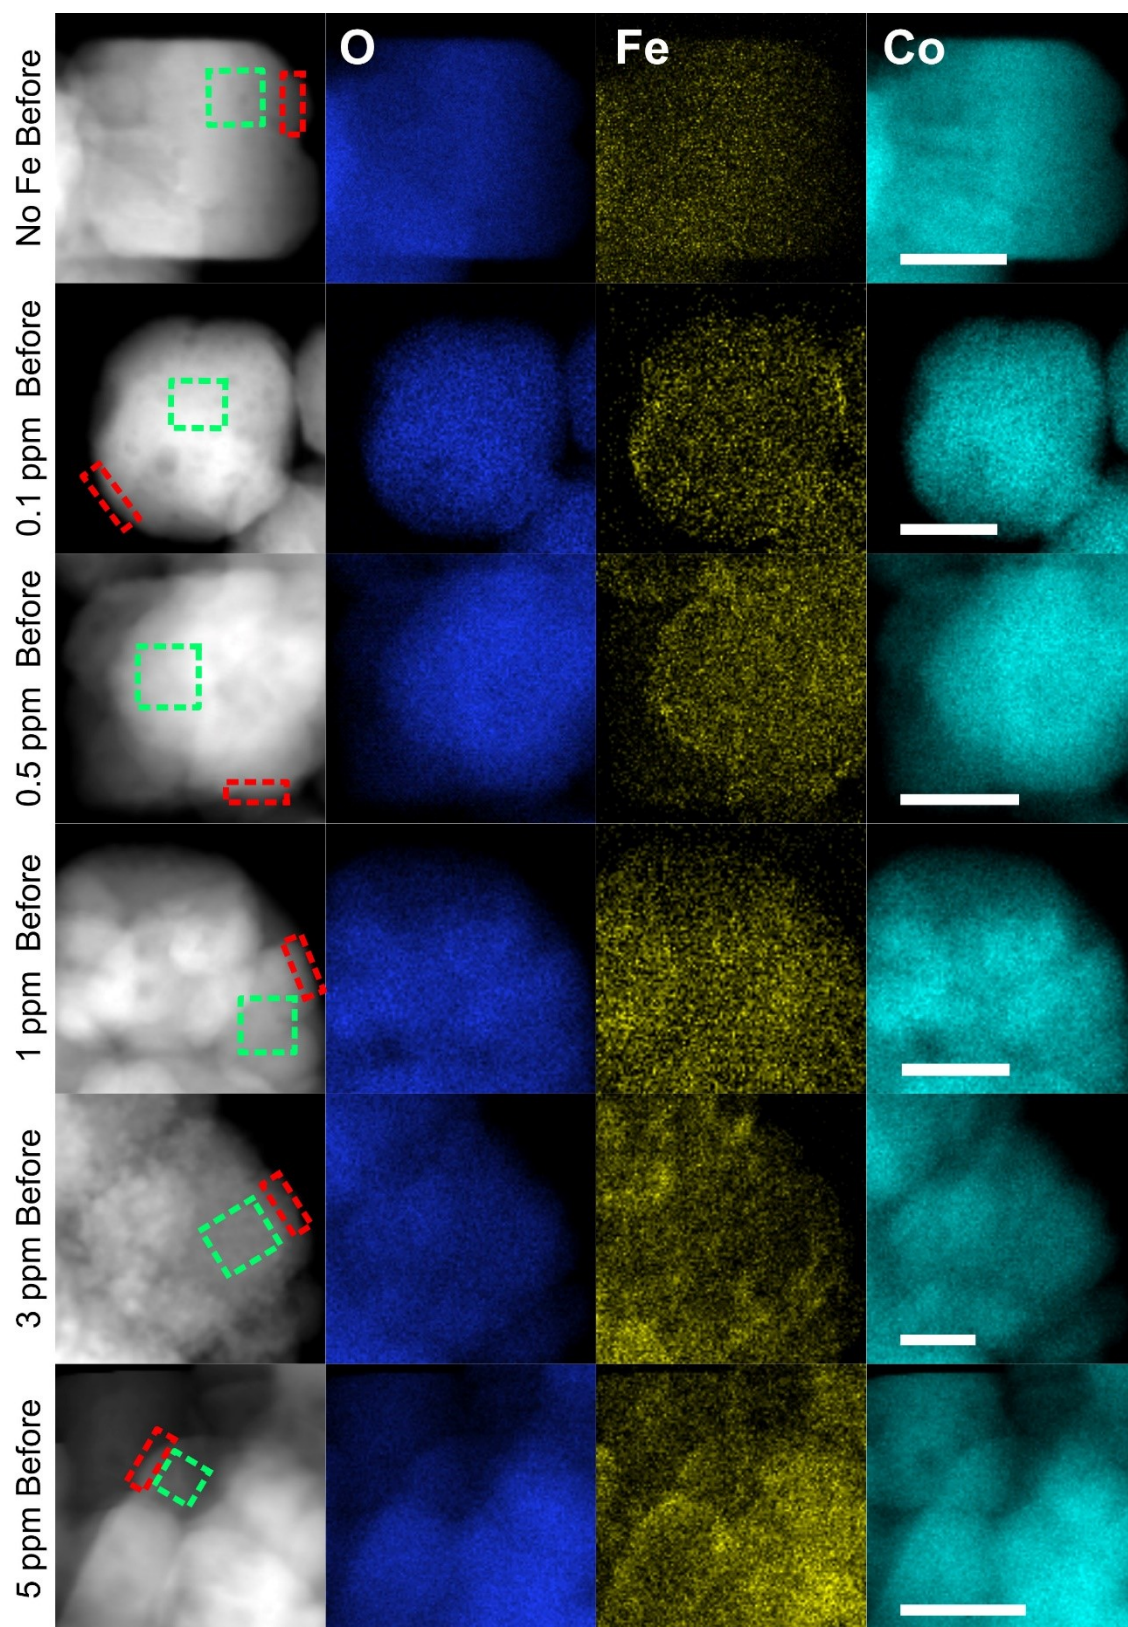

**Supplementary Figure 7.** STEM-HAADF and corresponding EDX O, Fe and Co- $K_{\alpha}$  color maps of irregular shape (rounded)  $\text{Co}_3\text{O}_4$  catalysts after conditioning for 1 h at  $1.45 V_{\text{RHE}}$  in 0.1 M KOH with different Fe contents. The highlighted regions were used to calculate the atomic percentage values shown in Supplementary Table 2. Scale bar is 20 nm.

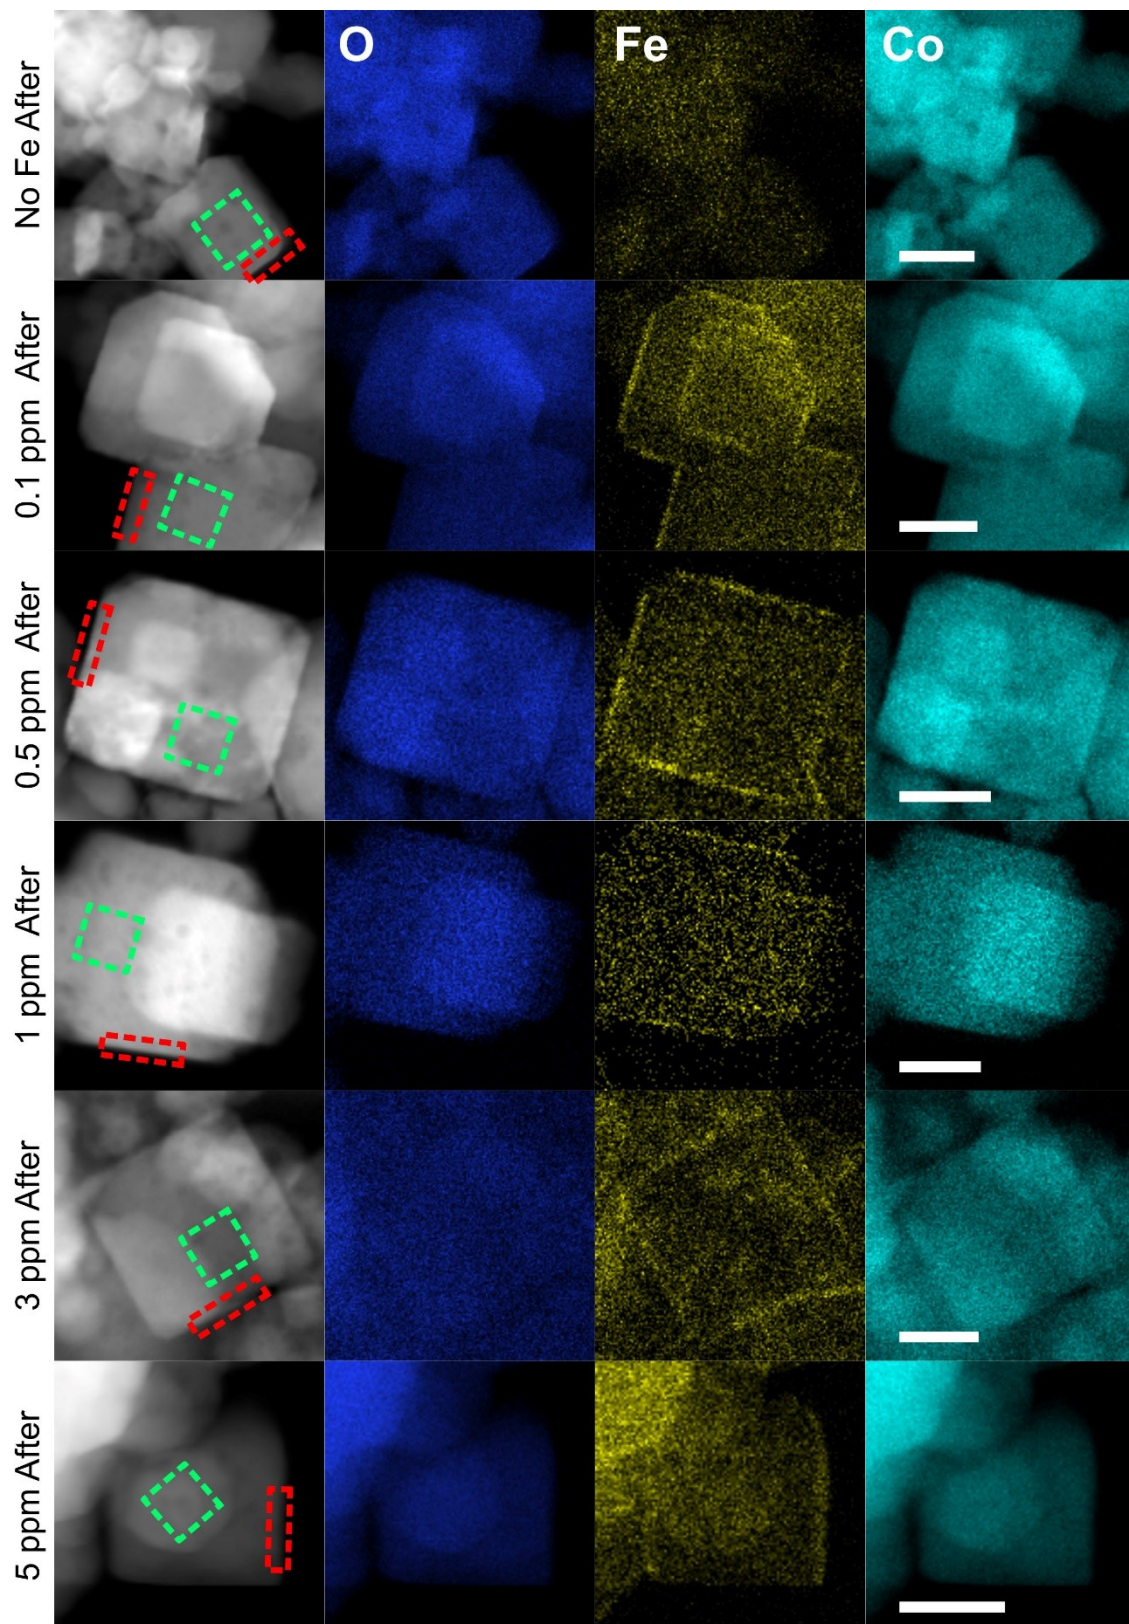

**Supplementary Figure 8.** STEM-HAADF and corresponding EDX O, Fe and Co- $K_{\alpha}$  color maps of cubic (low index facets)  $\text{Co}_3\text{O}_4$  catalysts after potential step experiments. The samples were previously conditioned in a 0.1 M KOH solution with different Fe contents and catalytically propped with potential steps for OER in Fe-free 0.1 M KOH. The highlighted regions were used to calculate the atomic percentage values shown in Supplementary Table 3. Scale bar is 20 nm.



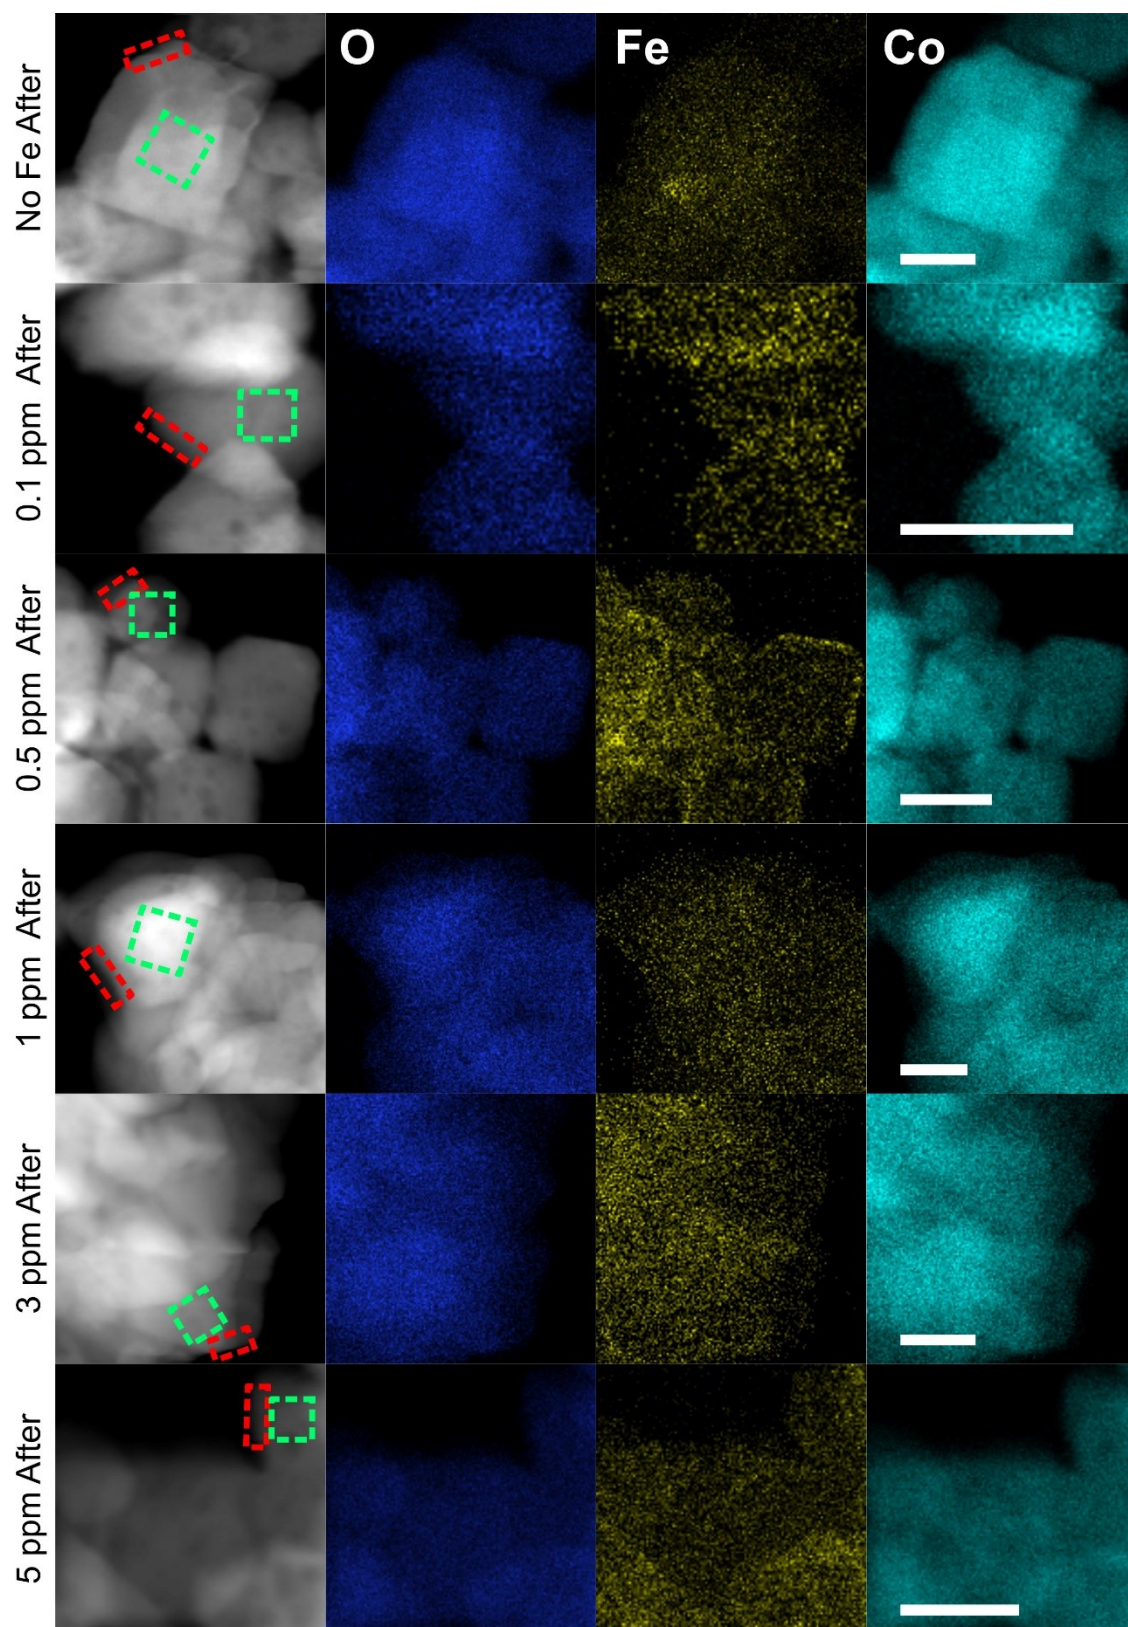

**Supplementary Figure 9.** STEM-HAADF and corresponding EDX O, Fe and Co- $K_{\alpha}$  color maps of irregular shape (rounded)  $\text{Co}_3\text{O}_4$  catalysts after potential step experiments. The samples were previously conditioned in a 0.1 M KOH solution with different Fe contents and catalytically propped with potential steps for OER in Fe-free 0.1 M KOH. The highlighted regions were used to calculate the atomic percentage values shown in Supplementary Table 3. Scale bar is 20 nm.

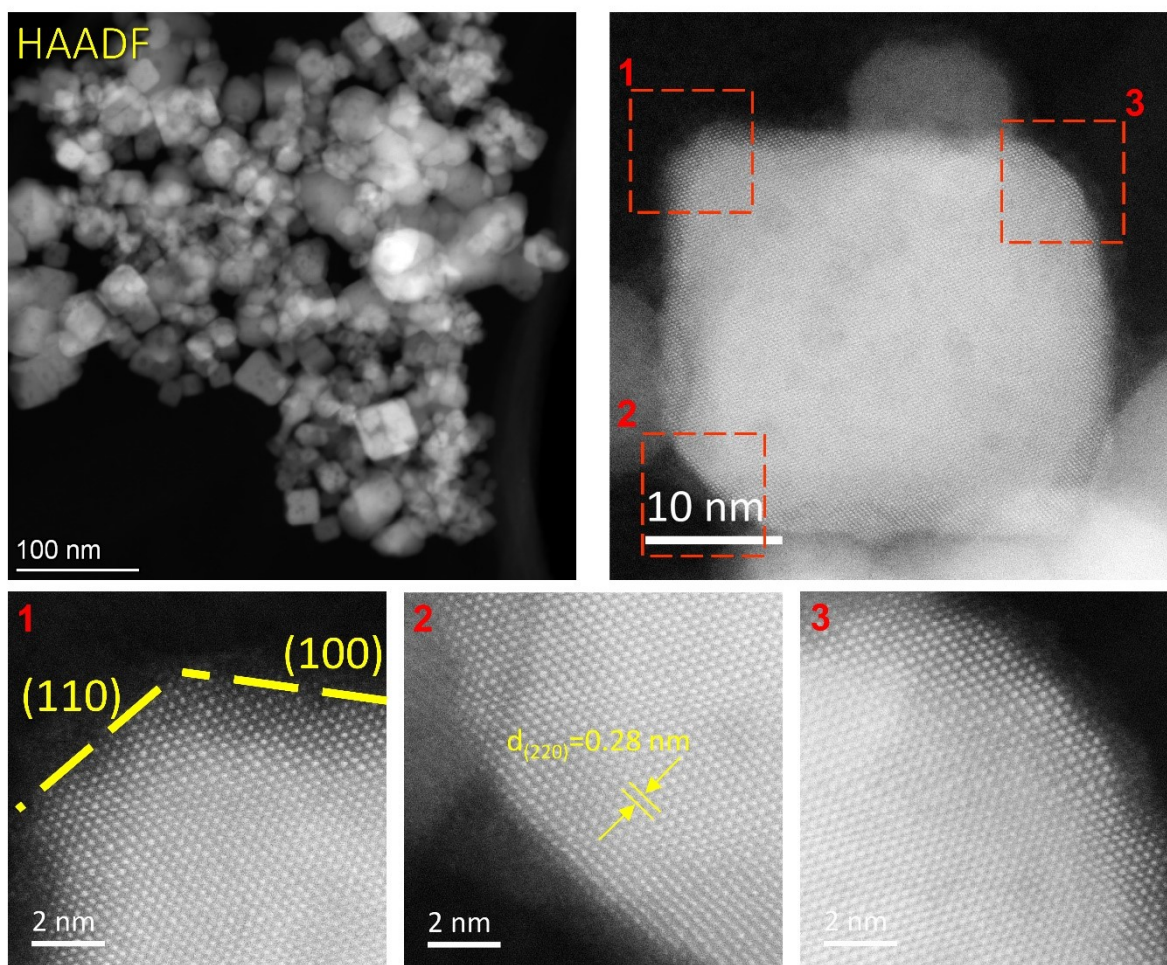

**Supplementary Figure 10.** High-resolution (HR-) TEM images of  $\text{Co}_3\text{O}_4$  NPs after conditioning for 1 h at  $1.45 \text{ V}_{\text{RHE}}$  in Fe-free 0.1 M KOH.

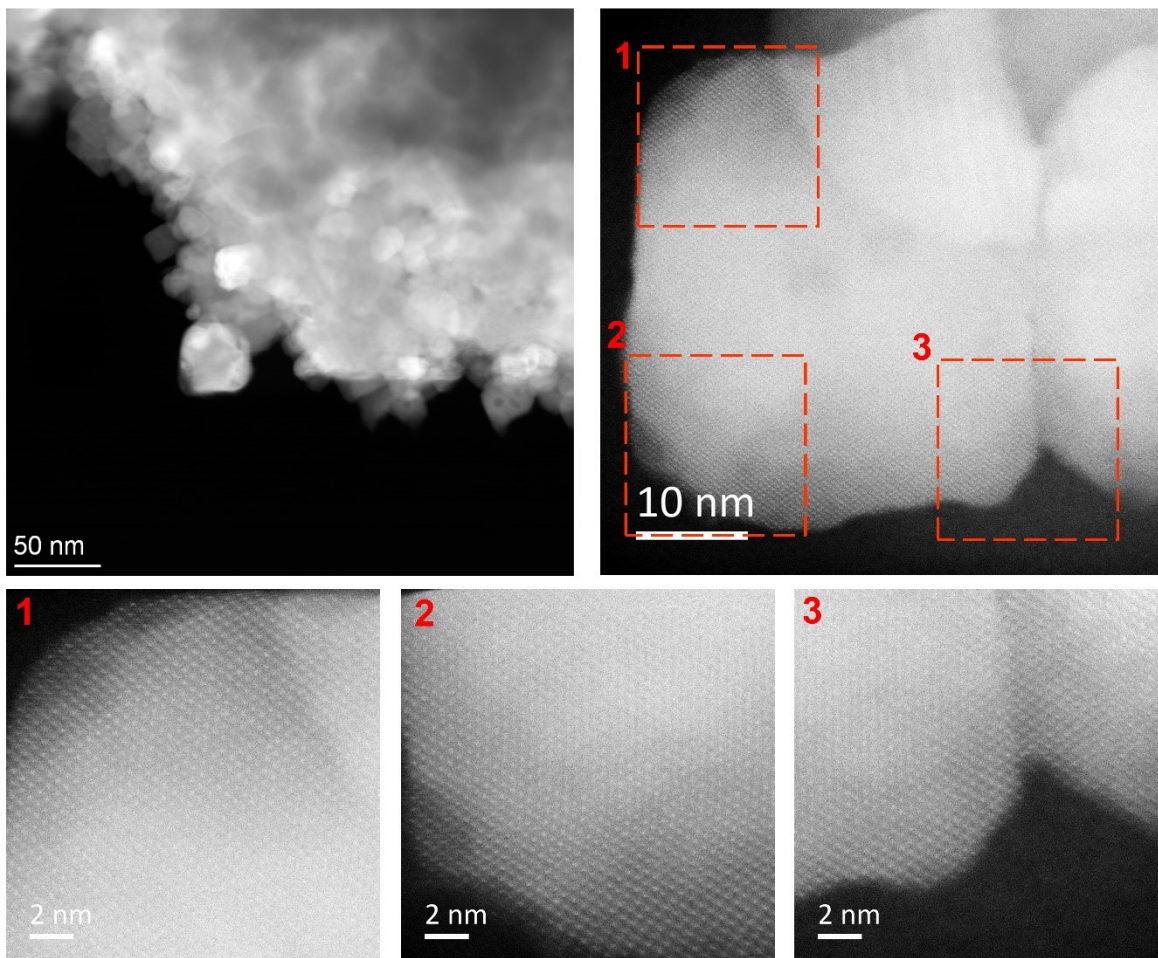

**Supplementary Figure 11.** High-resolution (HR-) TEM images of  $\text{Co}_3\text{O}_4$  NPs after conditioning for 1 h at  $1.45 \text{ V}_{\text{RHE}}$  in 5 ppm Fe containing 0.1 M KOH.

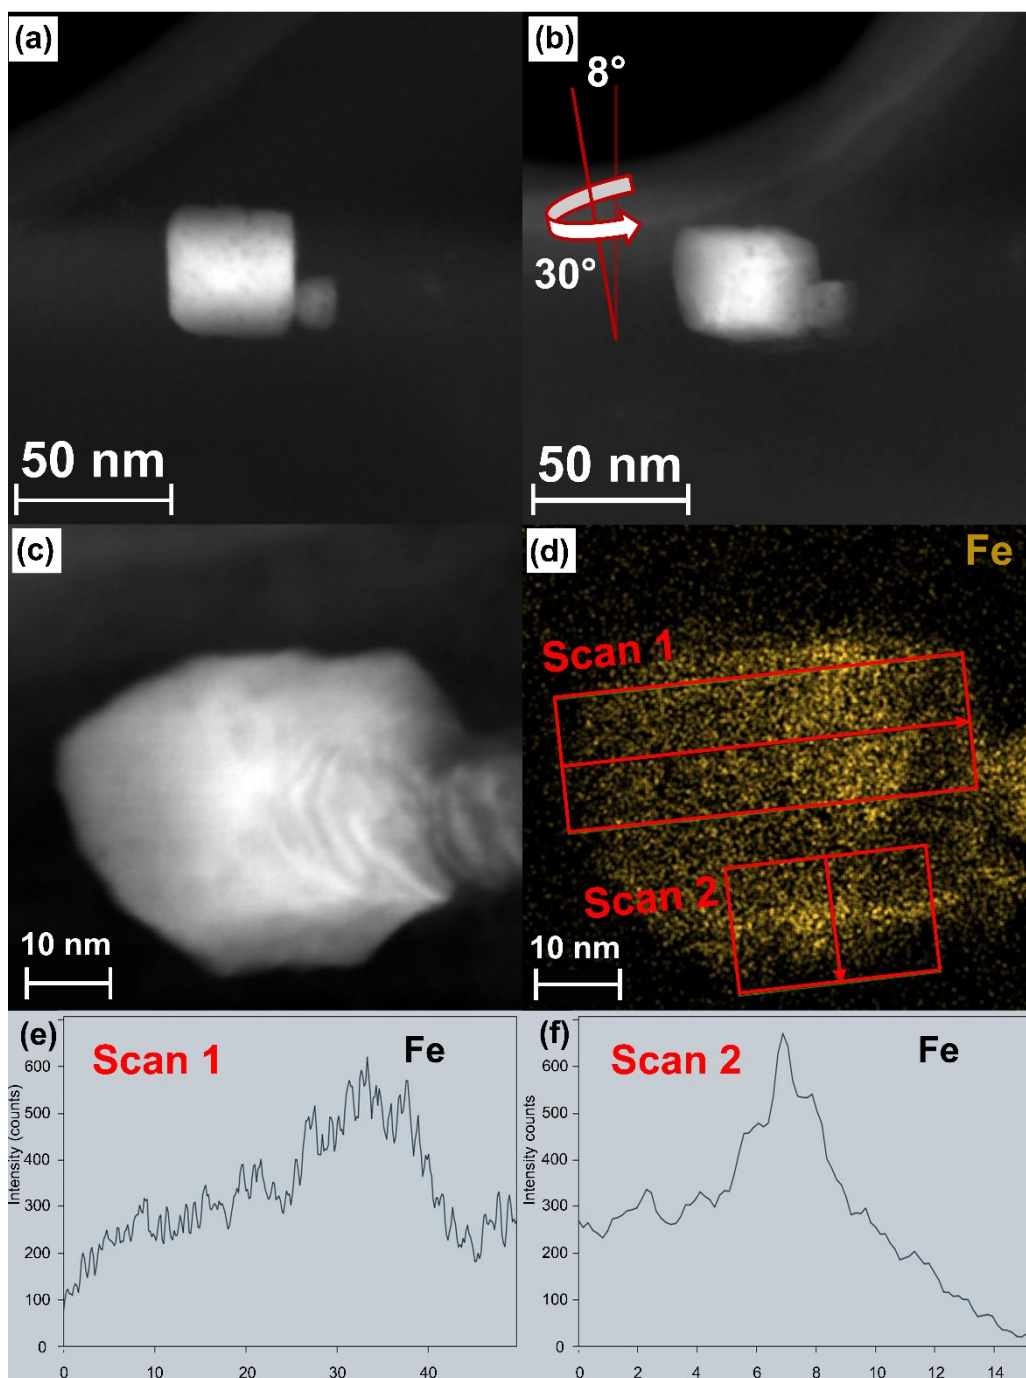

**Supplementary Figure 12.** STEM-EDX on single cubic  $\text{Co}_3\text{O}_4$  NPs to locate Fe on faces and edges after conditioning. (a) Leveled and (b) tilted dark-field image of 2 separated nanoparticles. (c) Magnified dark-field image with (d) corresponding STEM-EDX mapping and line scan 1 and 2. Fe counts of line scan 1 (e) and line scan 2 (f) from faces to edges.

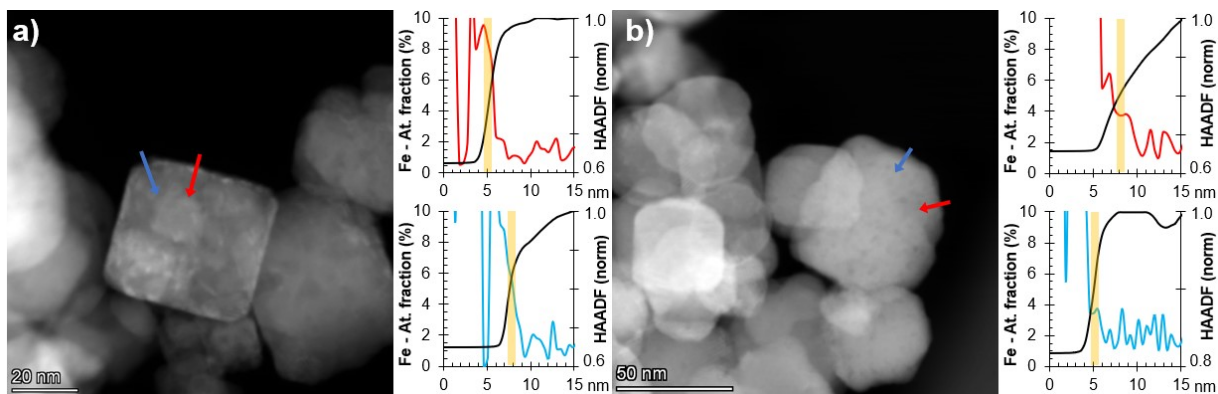

**Supplementary Figure 13.** STEM-HAADF and corresponding EDX Fe-Atomic fraction (Fe/(Fe+Co) ratio) scan lines from different  $\text{Co}_3\text{O}_4$  catalysts after conditioning in 0.1 M KOH with 1.0 ppm Fe. The lines represent the regions plotted on the right. (a) The scan line goes through a distinctive cubic structure with (100) and (110) facets (red and blue respectively). (b) A non-cubic nanoparticle has exposed higher order facets with a different Fe-doping profile.

**Supplementary Table 3:** Fe:Co ratio from background corrected semi-quantitative EDX from X-ray K-lines and XPS measurements after the conditioning in different Fe concentrations both in at.%.

| Conditioning         |       | 0 ppm     | 0.1 ppm   | 0.5 ppm   | 1.0 ppm   | 3.0 ppm   | 5.0 ppm   |
|----------------------|-------|-----------|-----------|-----------|-----------|-----------|-----------|
| Cubic NPs (at.%)     | (100) | 0.6 ± 0.1 | 3.1 ± 0.5 | 6.4 ± 0.9 | 12.3±1.3  | 16 ± 2    | 9.3 ± 1.3 |
|                      | Bulk  | 0.5 ± 0.1 | 0.6 ± 0.1 | 1.5 ± 0.2 | 1.6 ± 0.2 | 1.9 ± 0.3 | 1.5 ± 0.2 |
| Non-cubic NPs (at.%) | Edge  | 0.5 ± 0.1 | 2.0 ± 0.5 | 1.7 ± 0.3 | 2.6 ± 0.6 | 8.3 ± 1.2 | 7.3 ± 1.0 |
|                      | Bulk  | 0.5 ± 0.1 | 0.7 ± 0.1 | 0.9 ± 0.1 | 1.4 ± 0.1 | 2.0 ± 0.3 | 1.7 ± 0.3 |
| XPS (at.%)           |       | 0         | 9.5       | 12.2      | 14.7      | 21.9      | 21.3      |

**Supplementary Table 4:** Fe:Co ratio from background corrected semi-quantitative EDX from X-ray K-lines and XPS measurements after potential step measurements in Fe-free 0.1 M KOH both in at.%.

| Conditioning         |       | 0 ppm     | 0.1 ppm   | 0.5 ppm   | 1.0 ppm   | 3.0 ppm   | 5.0 ppm   |
|----------------------|-------|-----------|-----------|-----------|-----------|-----------|-----------|
| Cubic NPs (at.%)     | (100) | 0.8 ± 0.2 | 4.5 ± 0.6 | 4.4 ± 0.6 | 7.3 ± 0.8 | 11.6±1.5  | 8.7 ± 0.9 |
|                      | Bulk  | 0.6 ± 0.1 | 0.7 ± 0.1 | 0.8 ± 0.1 | 1.3 ± 0.2 | 2.9 ± 0.4 | 1.1 ± 0.2 |
| Non-cubic NPs (at.%) | Edge  | 0.7 ± 0.1 | 2.8 ± 1.0 | 4.6 ± 0.7 | 4.2 ± 0.7 | 3.9 ± 0.7 | 4.2 ± 0.8 |
|                      | Bulk  | 0.5 ± 0.1 | 1.6 ± 0.3 | 1.8 ± 0.3 | 1.6 ± 0.2 | 2.4 ± 0.4 | 1.1 ± 0.2 |
| XPS (at.%)           |       | 0         | 8.7       | 11.8      | 12.6      | 20.7      | 23.4      |

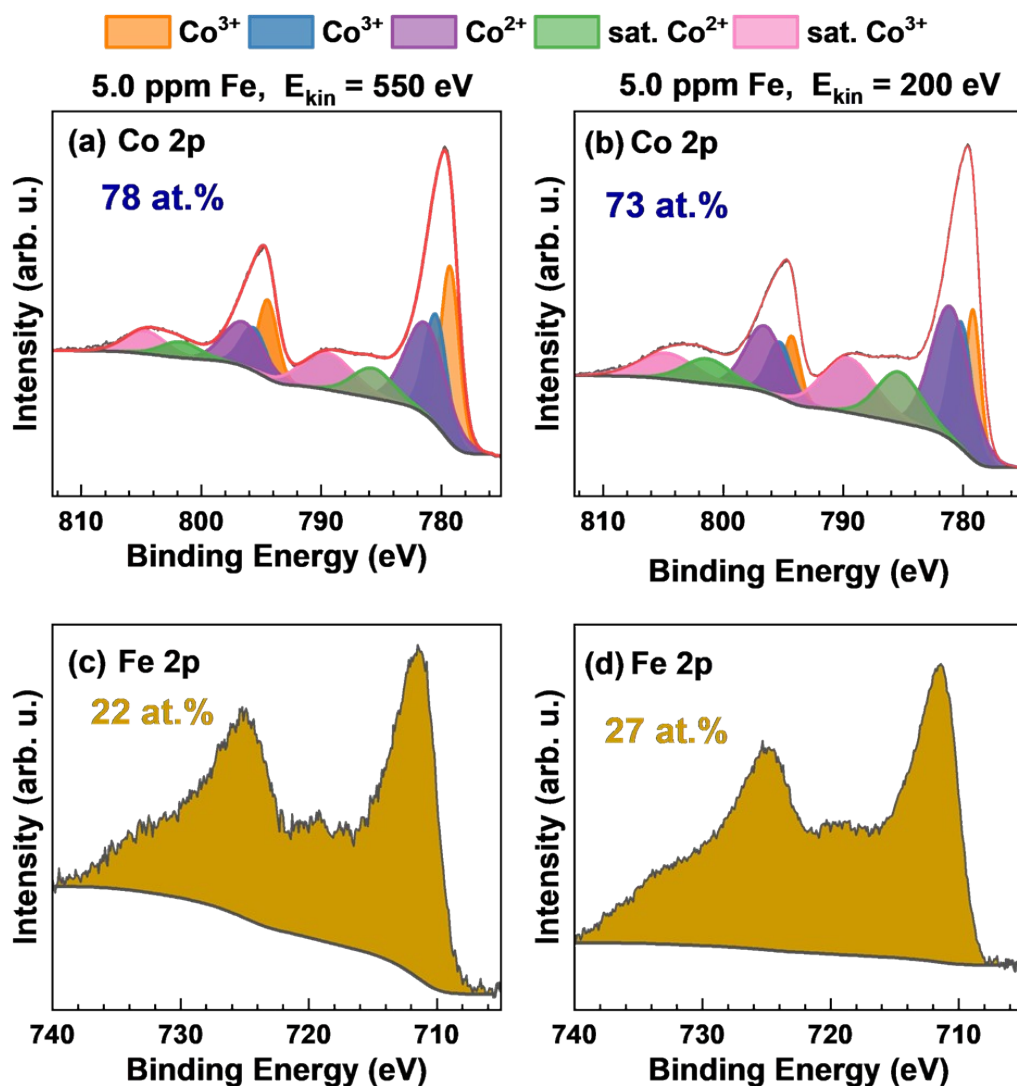

**Supplementary Figure 14.** Co and Fe 2p XPS spectra recorded with different excitation energies to collect photoelectrons with kinetic energies of 550 and 200 eV for depth-profiling for samples after conditioning in 5.0 ppm Fe containing 0.1 M KOH. The calculated mean free path for 550 eV kinetic energy is 10.4 Å and 5.6 Å for 200 eV. Multiplet fitting of Co 2p according to literature.<sup>1,2</sup> The Fe 2p XPS clearly show the absence of Fe<sup>2+</sup> at 709 eV as shown by Diebold et al.<sup>5,6</sup>, thus, suggesting the presence of Fe<sup>3+</sup> oxide species.

**Supplementary Table 5:** Co 2p XPS parameters of different fitted species after conditioning (Supplementary Figure 14). Provided are binding energies, FWHM and percentage of total peak area for each species.

| Species                     | <u>Co 2p E<sub>kin</sub> = 550 eV</u> |      |        | <u>Co 2p E<sub>kin</sub> = 200 eV</u> |      |        |
|-----------------------------|---------------------------------------|------|--------|---------------------------------------|------|--------|
|                             | Position (eV)                         | FWHM | area.% | Position (eV)                         | FWHM | area.% |
| <u>Co 2p<sub>3/2</sub></u>  |                                       |      |        |                                       |      |        |
| <b>Co<sup>3+</sup></b>      | 779.3                                 | 1.8  | 17.4   | 779.2                                 | 1.5  | 9.8    |
| <b>Co<sup>3+</sup></b>      | 780.5                                 | 2.2  | 13.2   | 780.2                                 | 2.1  | 11.8   |
| <b>Co<sup>2+</sup></b>      | 781.3                                 | 4.0  | 20.4   | 781.1                                 | 3.8  | 22.6   |
| <b>sat. Co<sup>2+</sup></b> | 785.7                                 | 4.0  | 6.6    | 785.4                                 | 4.3  | 9.8    |
| <b>sat. Co<sup>3+</sup></b> | 789.5                                 | 5.0  | 10.2   | 789.6                                 | 5.2  | 12.7   |
| <u>Co 2p<sub>1/2</sub></u>  |                                       |      |        |                                       |      |        |
| <b>Co<sup>3+</sup></b>      | 794.5                                 | 1.9  | 8.2    | 794.3                                 | 1.6  | 4.9    |
| <b>Co<sup>3+</sup></b>      | 795.7                                 | 2.5  | 6.0    | 795.3                                 | 2.4  | 5.9    |
| <b>Co<sup>2+</sup></b>      | 796.5                                 | 3.9  | 9.6    | 796.6                                 | 3.8  | 11.2   |
| <b>sat. Co<sup>2+</sup></b> | 801.7                                 | 3.8  | 3.4    | 801.4                                 | 4.5  | 5.1    |
| <b>sat. Co<sup>3+</sup></b> | 804.7                                 | 4.0  | 5.1    | 804.7                                 | 5.5  | 6.3    |



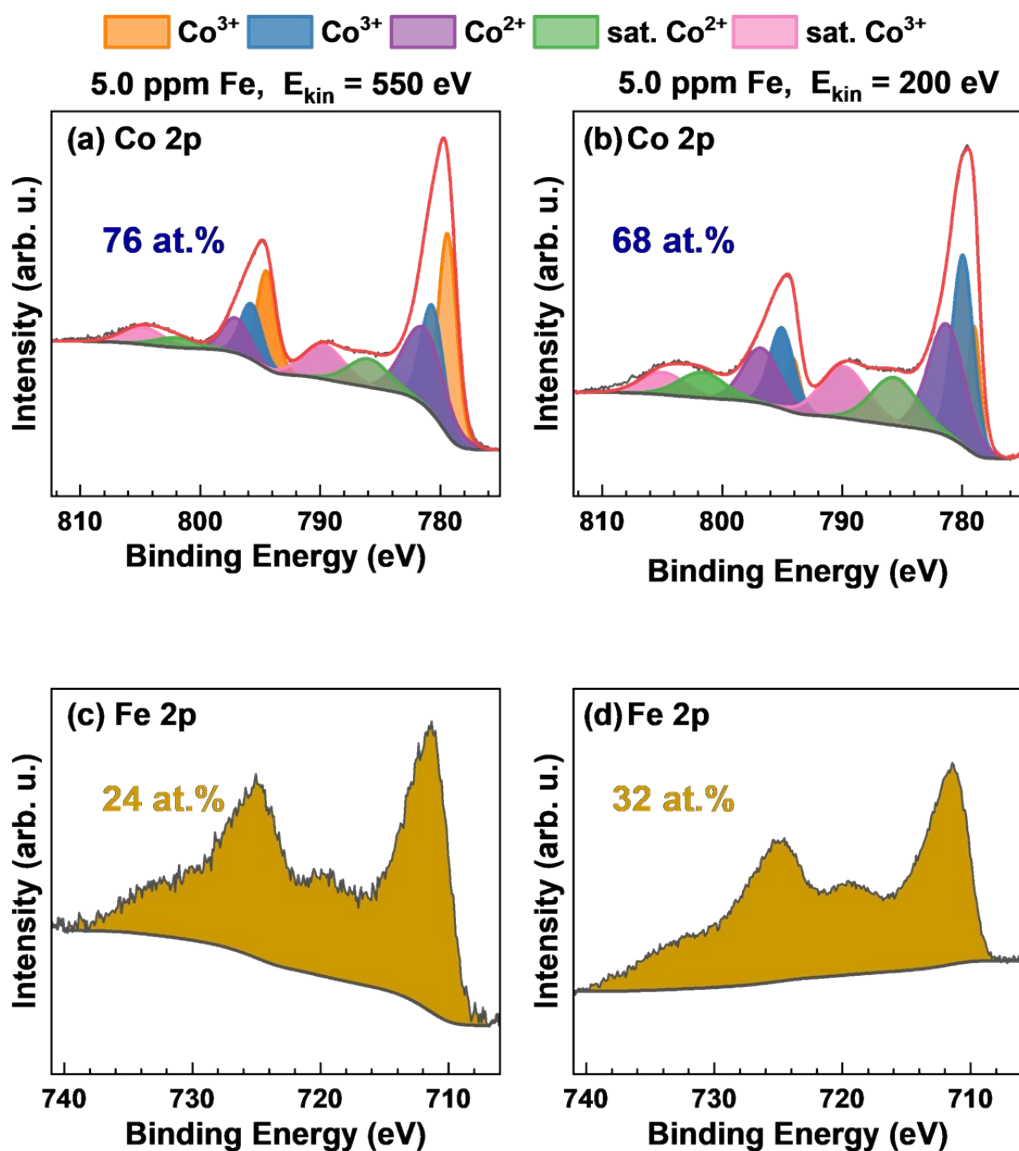

**Supplementary Figure 15.** Co and Fe 2p XPS spectra recorded with different excitation energies to collect photoelectrons with kinetic energies of 550 and 200 eV for depth-profiling for samples conditioned in 5 ppm Fe after OER steps in Fe-free 0.1 M KOH. The calculated mean free path for 550 eV kinetic energy is 10.4 Å and 5.6 Å for 200 eV. Multiplet fitting of Co 2p according to literature.<sup>1,2</sup>

**Supplementary Table 6:** Co 2p XPS parameters of different fitted species after conditioning (Supplementary Figure 15). Provided are binding energies, FWHM and percentage of total peak area for each species.

| Species                           | <u>Co 2p E<sub>kin</sub> = 550 eV</u> |      |        | <u>Co 2p E<sub>kin</sub> = 200 eV</u> |      |        |
|-----------------------------------|---------------------------------------|------|--------|---------------------------------------|------|--------|
|                                   | Position (eV)                         | FWHM | area.% | Position (eV)                         | FWHM | area.% |
| <b><u>Co 2p<sub>3/2</sub></u></b> |                                       |      |        |                                       |      |        |
| <b>Co<sup>3+</sup></b>            | 779.4                                 | 1.8  | 21.7   | 779.0                                 | 1.2  | 7.4    |
| <b>Co<sup>3+</sup></b>            | 780.7                                 | 2.2  | 14.2   | 779.9                                 | 2.1  | 18.8   |
| <b>Co<sup>2+</sup></b>            | 781.4                                 | 4.0  | 18.7   | 781.3                                 | 3.6  | 19.2   |
| <b>sat. Co<sup>2+</sup></b>       | 786.0                                 | 4.0  | 6.9    | 785.7                                 | 4.5  | 10.4   |
| <b>sat. Co<sup>3+</sup></b>       | 789.8                                 | 4.1  | 8.4    | 789.9                                 | 4.5  | 11.3   |
| <b><u>Co 2p<sub>1/2</sub></u></b> |                                       |      |        |                                       |      |        |
| <b>Co<sup>3+</sup></b>            | 794.5                                 | 1.8  | 10.8   | 794.1                                 | 1.4  | 3.7    |
| <b>Co<sup>3+</sup></b>            | 795.8                                 | 2.1  | 7.1    | 795.0                                 | 2.4  | 9.4    |
| <b>Co<sup>2+</sup></b>            | 797.1                                 | 2.6  | 5.6    | 796.8                                 | 3.6  | 9.5    |
| <b>sat. Co<sup>2+</sup></b>       | 802.0                                 | 4.0  | 2.4    | 801.7                                 | 4.5  | 5.6    |
| <b>sat. Co<sup>3+</sup></b>       | 804.9                                 | 4.0  | 4.2    | 805.0                                 | 4.3  | 4.7    |

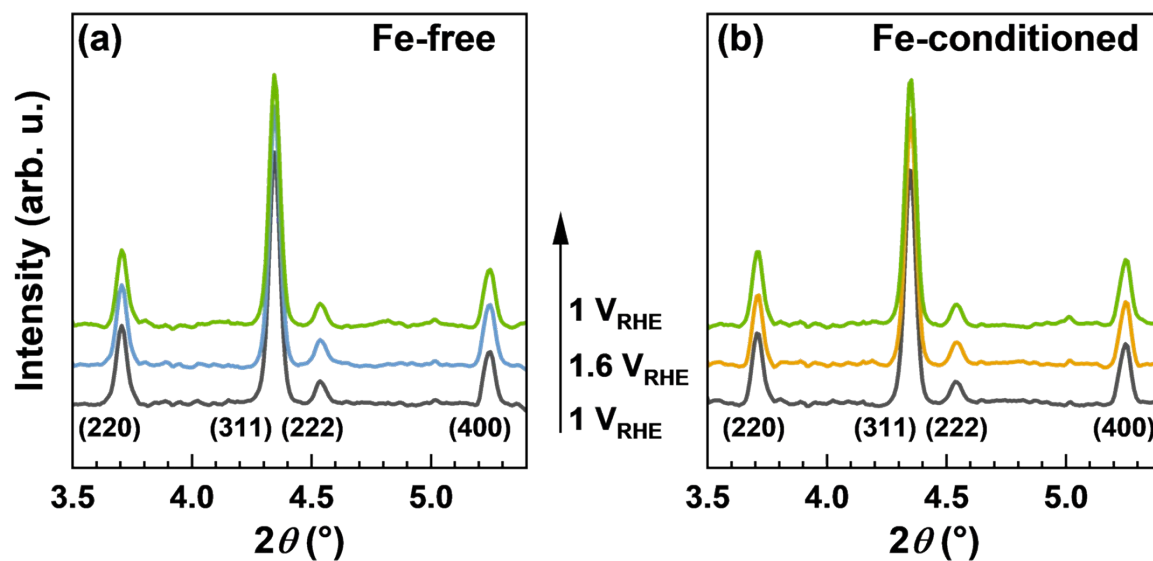

**Supplementary Figure 16.** Operando high-energy X-ray diffraction pattern excerpts recorded at 67 keV during Fe-free and Fe-conditioned  $\text{Co}_3\text{O}_4$  with highlighted Bragg reflections of a spinel structure. The electrode potentials are annotated and the sequence of measurements labeled with an arrow.

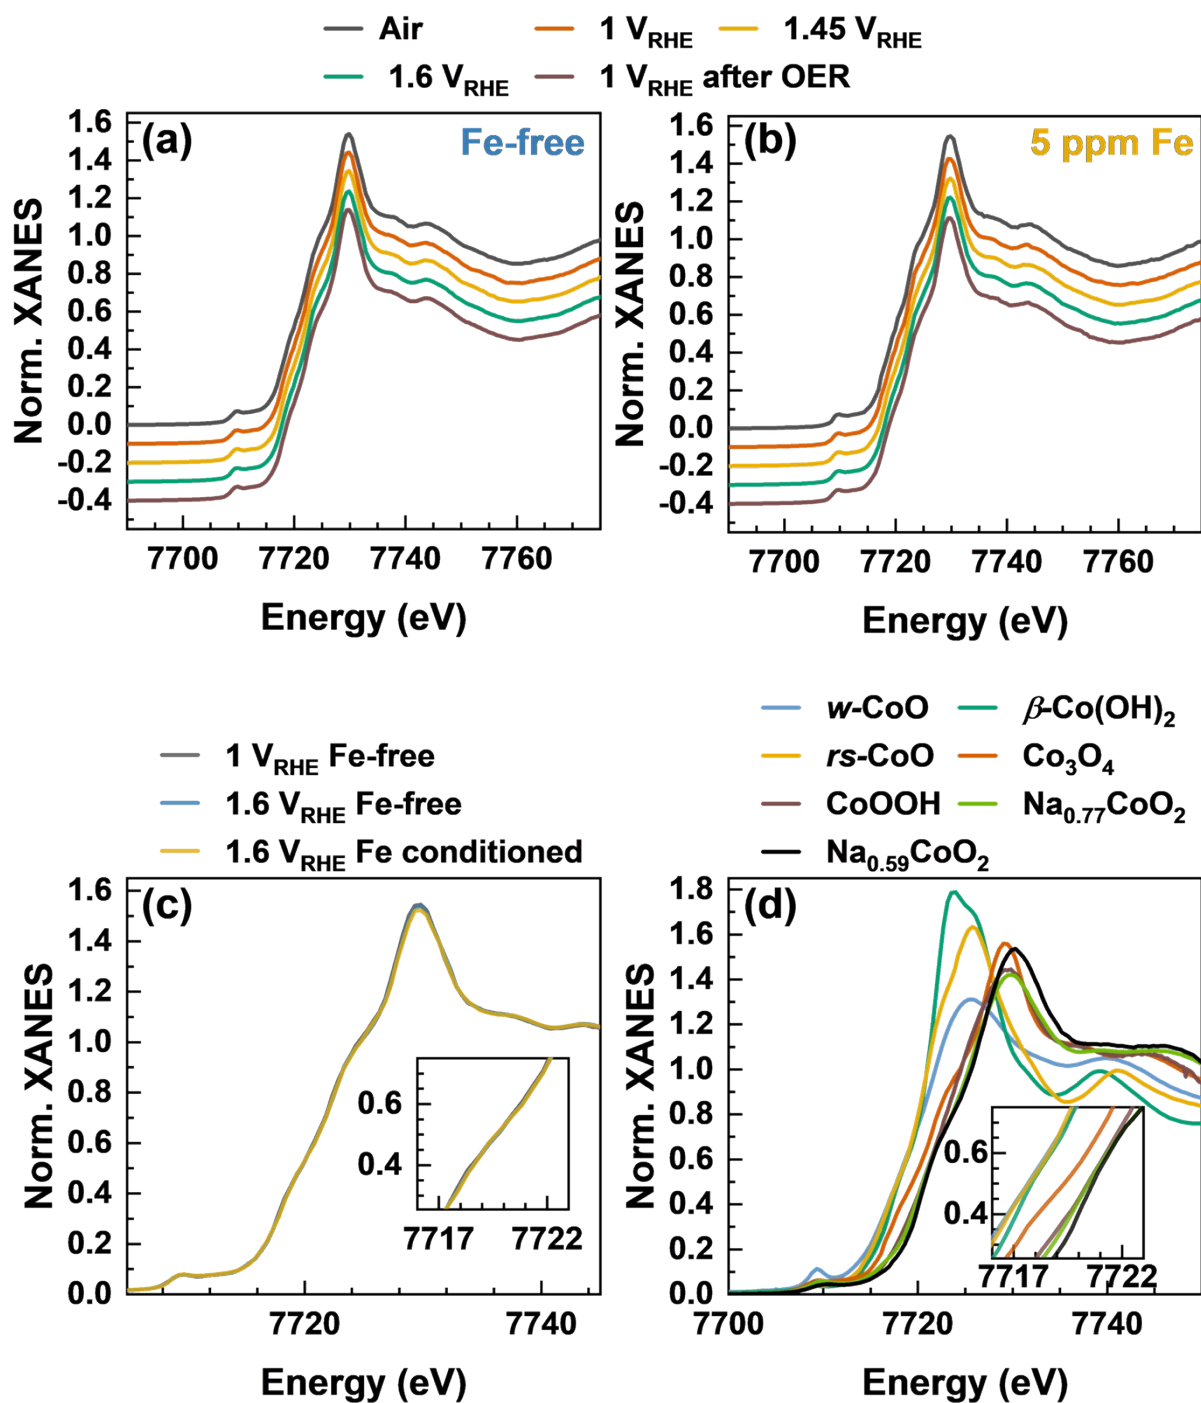

**Supplementary Figure 17.** (a) Co K-edge XANES after conditioning at 1.45 V<sub>RHE</sub> in Fe-free 0.1 M KOH. (b) Co K-edge XANES after conditioning at 1.45 V<sub>RHE</sub> in 5 ppm Fe and subsequent measurements in Fe-free 0.1 M KOH. (c) Comparison of Fe-free and Fe-conditioned XANES during OER at 1.6 V<sub>RHE</sub>. (d) Co K-edge XANES reference spectra.

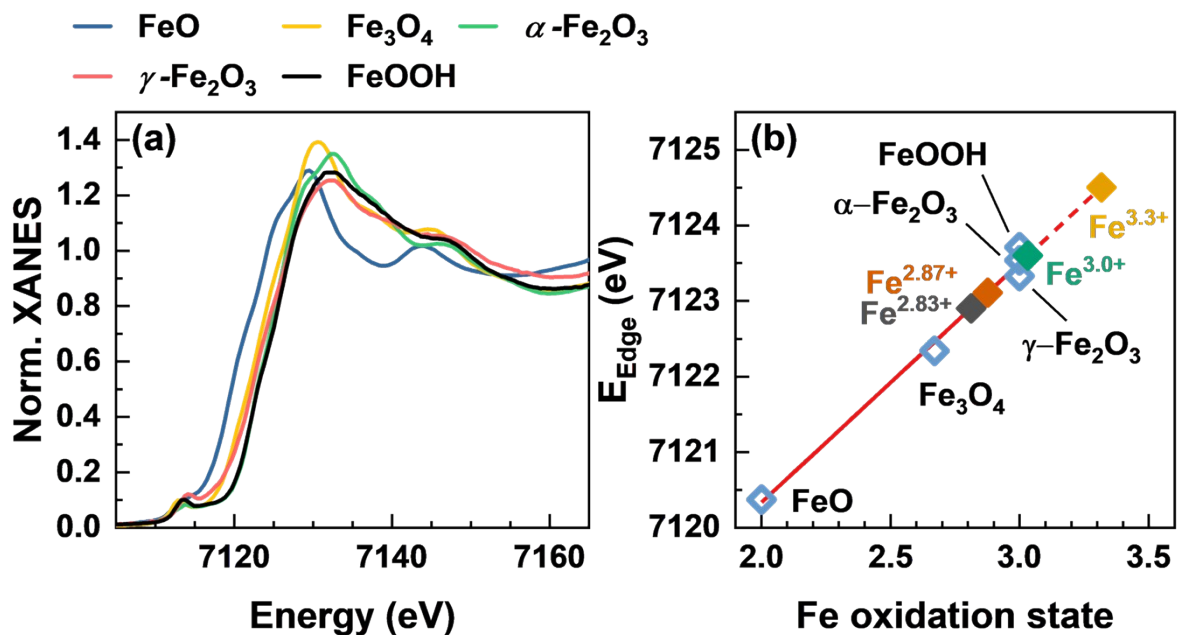

**Supplementary Figure 18.** (a) Fe K-edge XANES reference spectra and (b) linear calibration for calculation of oxidation states from absorption edge positions of Fe reference materials, displayed in blue.<sup>7,8</sup>

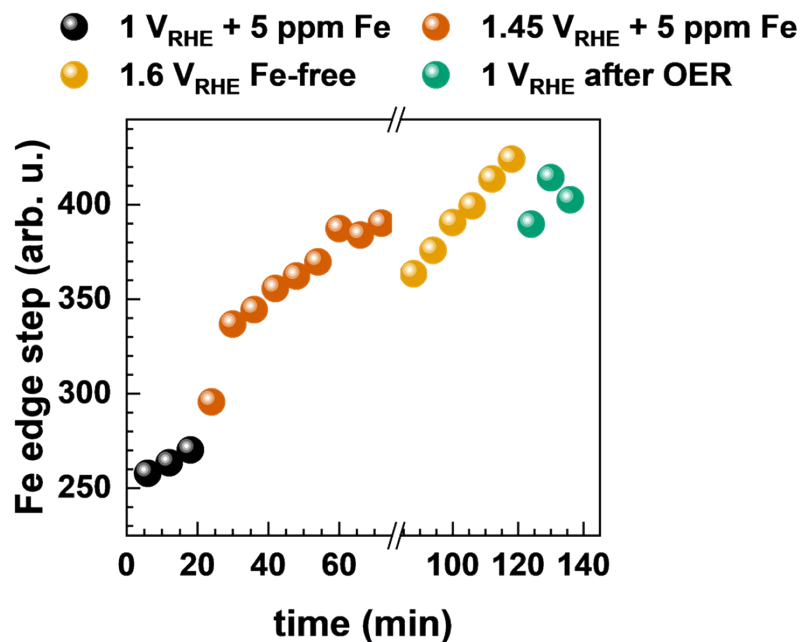

**Supplementary Figure 19.** Fe K-edge XANES edge step intensity at 1 V<sub>RHE</sub> in 5 ppm Fe before conditioning, during conditioning at 1.45 V<sub>RHE</sub> in 5 ppm Fe, during OER at 1.6 V<sub>RHE</sub> after switching to Fe-free electrolyte and at 1 V<sub>RHE</sub> after OER in Fe-free 0.1 M KOH.

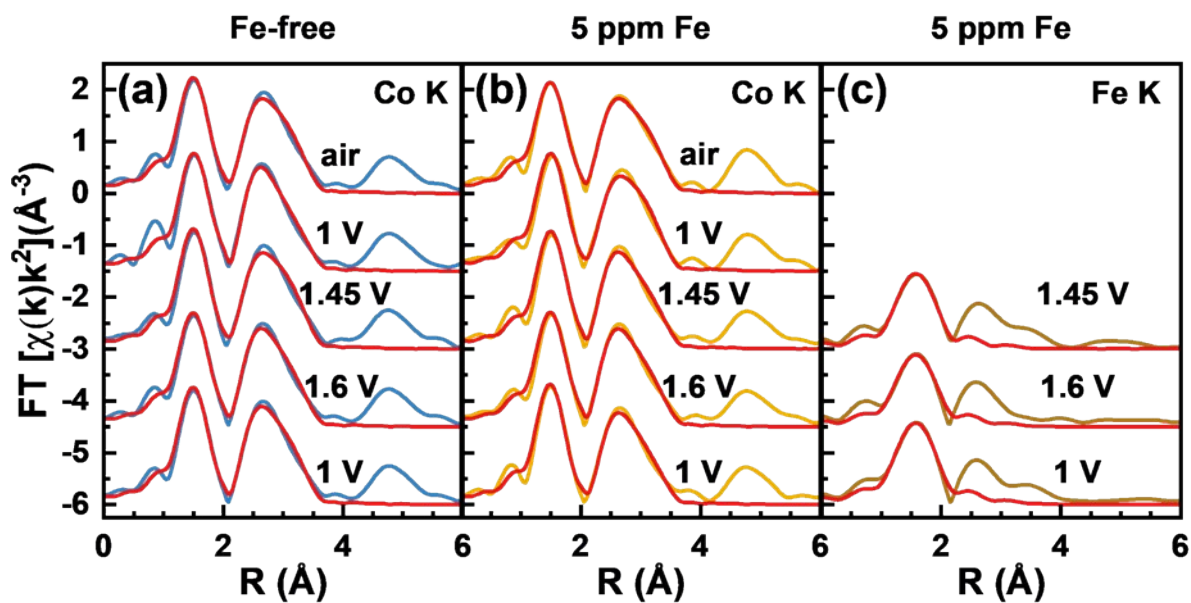

**Supplementary Figure 20.** Co K-edge FT-EXAFS in R-space with (a) Fe-free and (b), (c) Fe conditioning with 5 ppm Fe in 0.1 M KOH. conditioning.

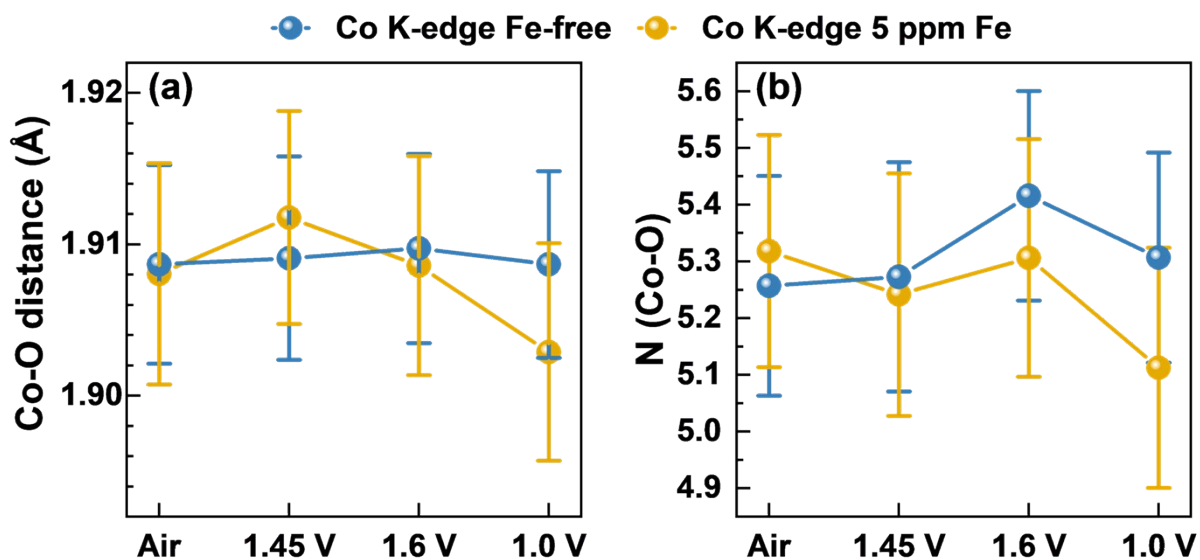

**Supplementary Figure 21.** (a) Co-O coordination number and (b) Co-O bond distance of the first coordination shell.

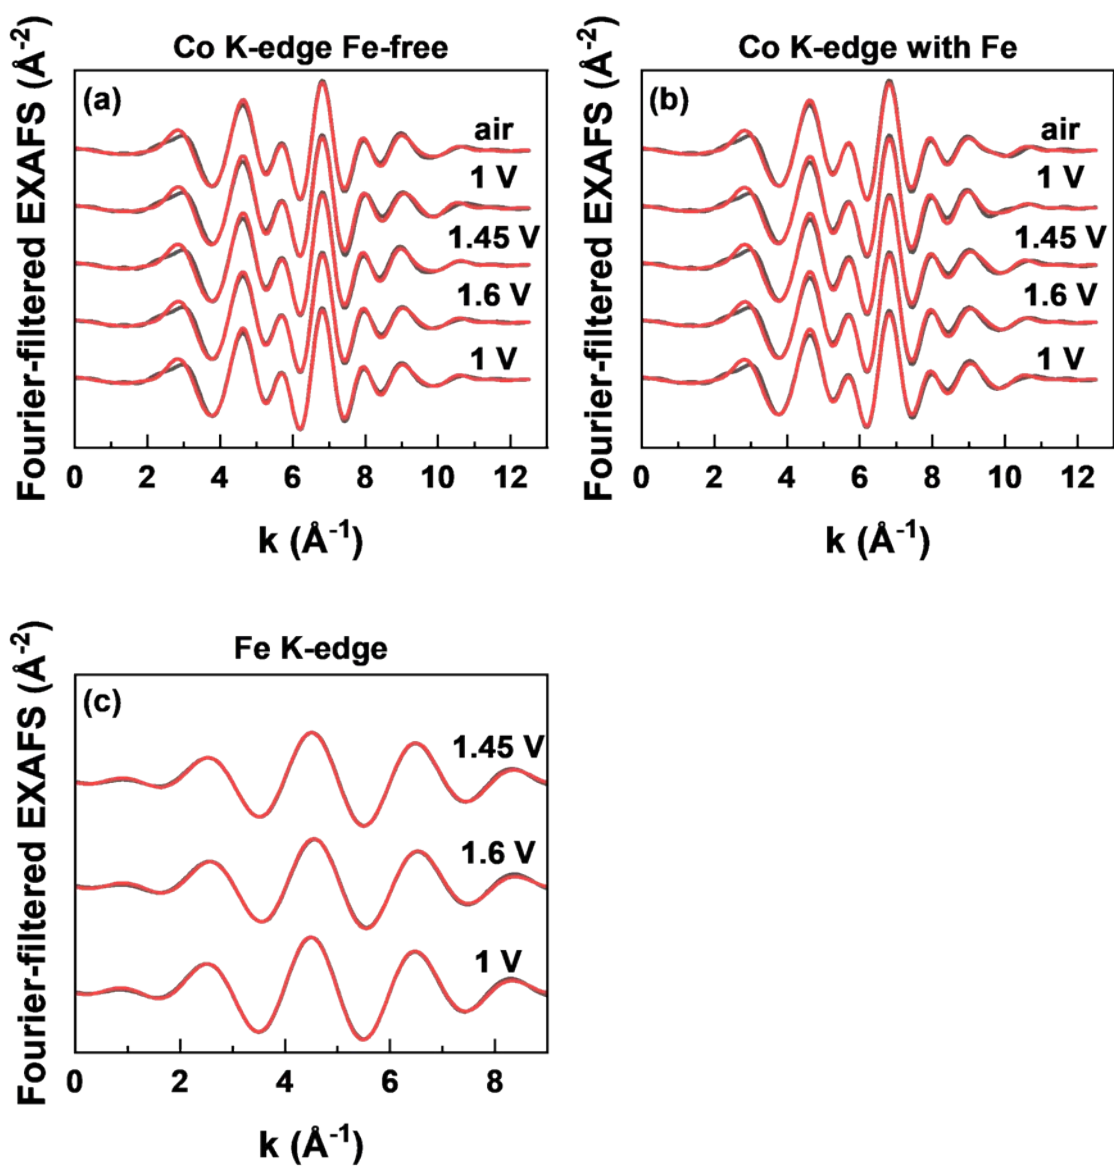

**Supplementary Figure 22.** Co K-edge FT-EXAFS in k-space with (a) Fe-free and (b), (c) Fe conditioning with 5 ppm Fe in 0.1 M KOH.

## **Supplementary Note 2: EXAFS fitting**

Coordination numbers  $N$ , interatomic distances  $R$ , disorder factors  $\sigma^2$  and energy shifts  $\Delta E_0$  were extracted from EXAFS fitting. At the Co K-edge, the first three coordination shells were fitted and attributed to Co-O, octahedrally oriented Co- $M_{Oh}$  and tetrahedrally oriented Co- $M_{Td}$  paths. Fits at the Fe K-edge include the first coordination shell (Fe-O contribution). All depicted error bars reflect the standard errors calculated from the EXAFS fitting results. At Co K-edge, the coordination numbers for the first 3 paths were calculated using a single variable "x" based on a published routine.<sup>9, 10</sup> The variable x is the fraction of Co in tetrahedral sites from the total number of Co in a spinel phase. The amplitude reduction factors  $S_0^2$  of 0.81 for Co K-edge and 0.7 for Fe K-edge were obtained by fitting EXAFS profiles of  $Co_3O_4$  and  $\alpha-Fe_2O_3$  reference materials with fixed coordination numbers. EXAFS fitting was carried out in R-space in the R-range 1.0-3.8 Å (Co K-edge) or 1.0-2.0 Å (Fe K-edge). At the Co K-edge the k-range used for Fourier transformation was set to 3-10 Å<sup>-1</sup>. For the Fe K-edge, the k-range was set to 3-8 Å<sup>-1</sup>.



**Supplementary Table 7:** EXAFS fitting parameters with Fe-free 0.1 M KOH conditioned at the Co K-edge.

| Fe-free                            | Co-Path        | N         | $x_{Co}$    | $\sigma^2$ ( $\text{\AA}^2$ ) | $\Delta E_0$ (eV) | R ( $\text{\AA}$ ) | Fit R-factor (%) |
|------------------------------------|----------------|-----------|-------------|-------------------------------|-------------------|--------------------|------------------|
| Air                                | O <sub>1</sub> | 5.3 ± 0.2 | 0.3 ± 0.1   | 0.0038 ± 0.0007               | 3.2 ± 0.7         | 1.909 ± 0.007      | <b>2.1</b>       |
|                                    | M <sub>1</sub> | 3.9 ± 0.6 |             | 0.003 ± 0.001                 |                   | 2.861 ± 0.007      |                  |
|                                    | M <sub>2</sub> | 9.3 ± 1.0 |             | 0.0073 ± 0.0009               |                   | 3.367 ± 0.008      |                  |
| 1 V <sub>RHE</sub>                 | O <sub>1</sub> | 5.3 ± 0.2 | 0.3 ± 0.1   | 0.0037 ± 0.0009               | 4.1 ± 0.8         | 1.920 ± 0.008      | <b>2.7</b>       |
|                                    | M <sub>1</sub> | 4.2 ± 0.7 |             | 0.002 ± 0.001                 |                   | 2.866 ± 0.008      |                  |
|                                    | M <sub>2</sub> | 9 ± 1     |             | 0.007 ± 0.001                 |                   | 3.38 ± 0.01        |                  |
| 1.45 V <sub>RHE</sub> conditioning | O <sub>1</sub> | 5.3 ± 0.2 | 0.3 ± 0.1   | 0.0033 ± 0.0008               | 3.3 ± 0.7         | 1.909 ± 0.007      | <b>2.2</b>       |
|                                    | M <sub>1</sub> | 4.0 ± 0.6 |             | 0.003 ± 0.001                 |                   | 2.860 ± 0.008      |                  |
|                                    | M <sub>2</sub> | 9 ± 1     |             | 0.0066 ± 0.0009               |                   | 3.367 ± 0.008      |                  |
| 1.6 V <sub>RHE</sub>               | O <sub>1</sub> | 5.4 ± 0.2 | 0.26 ± 0.09 | 0.0045 ± 0.0007               | 3.5 ± 0.7         | 1.910 ± 0.006      | <b>1.8</b>       |
|                                    | M <sub>1</sub> | 4.4 ± 0.6 |             | 0.004 ± 0.001                 |                   | 2.863 ± 0.007      |                  |
|                                    | M <sub>2</sub> | 8.5 ± 0.9 |             | 0.0070 ± 0.0009               |                   | 3.370 ± 0.008      |                  |
| 1 V <sub>RHE</sub> after OER       | O <sub>1</sub> | 5.3 ± 0.2 | 0.31 ± 0.09 | 0.0038 ± 0.0007               | 3.3 ± 0.7         | 1.909 ± 0.006      | <b>1.9</b>       |
|                                    | M <sub>1</sub> | 4.1 ± 0.6 |             | 0.003 ± 0.001                 |                   | 2.861 ± 0.007      |                  |
|                                    | M <sub>2</sub> | 9.0 ± 0.9 |             | 0.0070 ± 0.0008               |                   | 3.369 ± 0.008      |                  |

**Supplementary Table 8:** EXAFS fitting parameters with 5 ppm Fe in 0.1 M KOH conditioned at the Co K-edge.

| 5 ppm Fe                           | Co-Path        | N         | $x_{\text{Co}}$ | $\sigma^2$ ( $\text{\AA}^2$ ) | $\Delta E_0$ (eV) | R ( $\text{\AA}$ ) | Fit R-factor (%) |
|------------------------------------|----------------|-----------|-----------------|-------------------------------|-------------------|--------------------|------------------|
| Air                                | O <sub>1</sub> | 5.3 ± 0.2 | 0.3 ± 0.1       | 0.0045 ± 0.0008               | 3.1 ± 0.7         | 1.908 ± 0.007      | <b>2.2</b>       |
|                                    | M <sub>1</sub> | 4.1 ± 0.6 |                 | 0.003 ± 0.001                 |                   | 2.856 ± 0.008      |                  |
|                                    | M <sub>2</sub> | 9 ± 1     |                 | 0.0067 ± 0.0009               |                   | 3.369 ± 0.009      |                  |
| 1 V <sub>RHE</sub>                 | O <sub>1</sub> | 5.3 ± 0.2 | 0.3 ± 0.1       | 0.0036 ± 0.0009               | 3.2 ± 0.8         | 1.912 ± 0.008      | <b>3.1</b>       |
|                                    | M <sub>1</sub> | 4.1 ± 0.6 |                 | 0.004 ± 0.001                 |                   | 2.861 ± 0.009      |                  |
|                                    | M <sub>2</sub> | 9 ± 1     |                 | 0.007 ± 0.001                 |                   | 3.36 ± 0.01        |                  |
| 1.45 V <sub>RHE</sub> conditioning | O <sub>1</sub> | 5.2 ± 0.2 | 0.3 ± 0.1       | 0.0035 ± 0.0008               | 3.5 ± 0.8         | 1.912 ± 0.007      | <b>2.7</b>       |
|                                    | M <sub>1</sub> | 3.9 ± 0.6 |                 | 0.002 ± 0.001                 |                   | 2.859 ± 0.008      |                  |
|                                    | M <sub>2</sub> | 9 ± 1     |                 | 0.0078 ± 0.0009               |                   | 3.372 ± 0.009      |                  |
| 1.6 V <sub>RHE</sub>               | O <sub>1</sub> | 5.3 ± 0.2 | 0.3 ± 0.1       | 0.0041 ± 0.0008               | 3.3 ± 0.8         | 1.909 ± 0.007      | <b>2.5</b>       |
|                                    | M <sub>1</sub> | 4.1 ± 0.6 |                 | 0.003 ± 0.001                 |                   | 2.859 ± 0.008      |                  |
|                                    | M <sub>2</sub> | 9 ± 1     |                 | 0.007 ± 0.001                 |                   | 3.369 ± 0.009      |                  |
| 1 V <sub>RHE</sub> after OER       | O <sub>1</sub> | 5.1 ± 0.2 | 0.4 ± 0.1       | 0.0029 ± 0.0008               | 2.7 ± 0.8         | 1.903 ± 0.007      | <b>2.8</b>       |
|                                    | M <sub>1</sub> | 3.5 ± 0.6 |                 | 0.003 ± 0.001                 |                   | 2.858 ± 0.008      |                  |
|                                    | M <sub>2</sub> | 10 ± 1    |                 | 0.009 ± 0.001                 |                   | 3.36 ± 0.01        |                  |

**Supplementary Table 9:** EXAFS fitting parameters with 5 ppm Fe in 0.1 M KOH conditioned at the Fe K-edge.

| <b>5 ppm Fe</b>                    | <b>Fe-Path</b> | <b>N</b>  | <b><math>\sigma^2</math> (<math>\text{\AA}^2</math>)</b> | <b><math>\Delta E_0</math> (eV)</b> | <b>R (<math>\text{\AA}</math>)</b> | <b>Fit R-factor (%)</b> |
|------------------------------------|----------------|-----------|----------------------------------------------------------|-------------------------------------|------------------------------------|-------------------------|
| 1.45 V <sub>RHE</sub> conditioning | O <sub>1</sub> | 4.4 ± 0.2 | 0.001 ± 0.001                                            | 4.2 ± 0.5                           | 1.990 ± 0.005                      | <b>0.5</b>              |
| 1.6 V <sub>RHE</sub>               | O <sub>1</sub> | 4.5 ± 0.3 | 0.002 ± 0.001                                            | 4.8 ± 0.7                           | 1.984 ± 0.007                      | <b>0.8</b>              |
| 1 V <sub>RHE</sub> after OER       | O <sub>1</sub> | 5.6 ± 0.3 | 0.004 ± 0.001                                            | 3.8 ± 0.6                           | 1.994 ± 0.006                      | <b>0.6</b>              |

## References

1. M. C. Biesinger, B. P. Payne, A. P. Grosvenor, L. W. Lau, A. R. Gerson and R. S. C. Smart, *Appl. Surf. Sci.*, 2011, **257**, 2717-2730.
2. R. P. Gupta and S. K. Sen, *Phys. Rev. B*, 1975, **12**, 15-19.
3. F. T. Haase, A. Bergmann, T. E. Jones, J. Timoshenko, A. Herzog, H. S. Jeon, C. Rettenmaier and B. Roldan Cuenya, *Nat. Energy*, 2022, **7**, 765-773.
4. J. Yang, H. Liu, W. N. Martens and R. L. Frost, *J. Phys. Chem. C*, 2010, **114**, 111-119.
5. D. Grumelli, T. Wiegmann, S. Barja, F. Reikowski, F. Maroun, P. Allongue, J. Balajka, G. S. Parkinson, U. Diebold and K. Kern, *Angew. Chem. Int. Ed.*, 2020, **59**, 21904-21908.
6. M. Müllner, M. Riva, F. Kraushofer, M. Schmid, G. S. Parkinson, S. F. Mertens and U. Diebold, *J. Phys. Chem. C*, 2018, **123**, 8304-8311.
7. J. Dittmer, L. Iuzzolino, W. Dörner, H.-F. Nolting, W. Meyer-Klaucke and H. Dau, *Photosynthesis: Mechanisms and Effects*, 1998, **2**, 1339-1342.
8. H. Dau, P. Liebisch and M. Haumann, *Anal. Bioanal. Chem.*, 2003, **376**, 562-583.
9. S. Saddeler, G. Bendt, S. Salamon, F. T. Haase, J. Landers, J. Timoshenko, C. Rettenmaier, H. S. Jeon, A. Bergmann, H. Wende, B. Roldan Cuenya and S. Schulz, *J. Mater. Chem. A*, 2021, **9**, 25381-25390.
10. F. T. Haase, A. Rabe, F.-P. Schmidt, A. Herzog, H. S. Jeon, W. Frandsen, P. V. Narangoda, I. Spanos, K. Friedel Ortega, J. Timoshenko, T. Lunkenbein, M. Behrens, A. Bergmann, R. Schlögl and B. Roldan Cuenya, *J. Am. Chem. Soc.*, 2022, **144**, 12007-12019.
